# Supplementary material for: Daughter Provides Stem Cells To Give Mom Better Vision
Source: Royal Society of Chemistry journal article supplement (doi:10.1039/c4mb00529e), 2014-01-01
Supplement: c4mb00529e1.pdf [file c4mb00529e1.pdf]

## Supplementary Information

**Table S-1 Gradient elution program applied for UHPLC-MS analysis for ES- modes.**

| Time(min) | Flow rate<br>(ml/min <sup>-1</sup> ) | Mobile phase |      | Curve |
|-----------|--------------------------------------|--------------|------|-------|
|           |                                      | A(%)         | B(%) |       |
| Initial   | 0.4                                  | 100%         | 0%   | 6     |
| 2         | 0.4                                  | 100%         | 0%   | 6     |
| 17        | 0.4                                  | 0%           | 100% | 6     |
| 22        | 0.4                                  | 0%           | 100% | 6     |
| 24        | 0.4                                  | 100%         | 0%   | 6     |
| 28        | 0.4                                  | 100%         | 0%   | 6     |

**Table S-2 The repeatability and stability data of the proposed method**

| Mode | Selected m/z | Rt (min) |       | Peak area   |       |
|------|--------------|----------|-------|-------------|-------|
|      |              | Mean     | RSD%  | Mean        | RSD%  |
| ES-  | 215.0330     | 0.73     | 1.06% | 55785708.80 | 4.00% |
|      | 191.0196     | 1.57     | 1.11% | 25806993.84 | 6.81% |
|      | 103.0401     | 2.43     | 1.03% | 25270094.47 | 6.40% |
|      | 155.0461     | 4.80     | 0.99% | 9888103.35  | 8.99% |
|      | 203.0824     | 5.55     | 1.17% | 13539195.92 | 5.23% |
|      | 283.0820     | 7.06     | 1.14% | 3691408.41  | 5.22% |
|      | 225.1245     | 9.60     | 1.27% | 22826787.48 | 7.24% |
|      | 407.2802     | 11.36    | 1.33% | 11078232.75 | 4.53% |
|      | 540.3301     | 13.54    | 1.18% | 18739822.82 | 4.34% |
|      | 554.3454     | 14.48    | 1.09% | 7320692.67  | 6.03% |

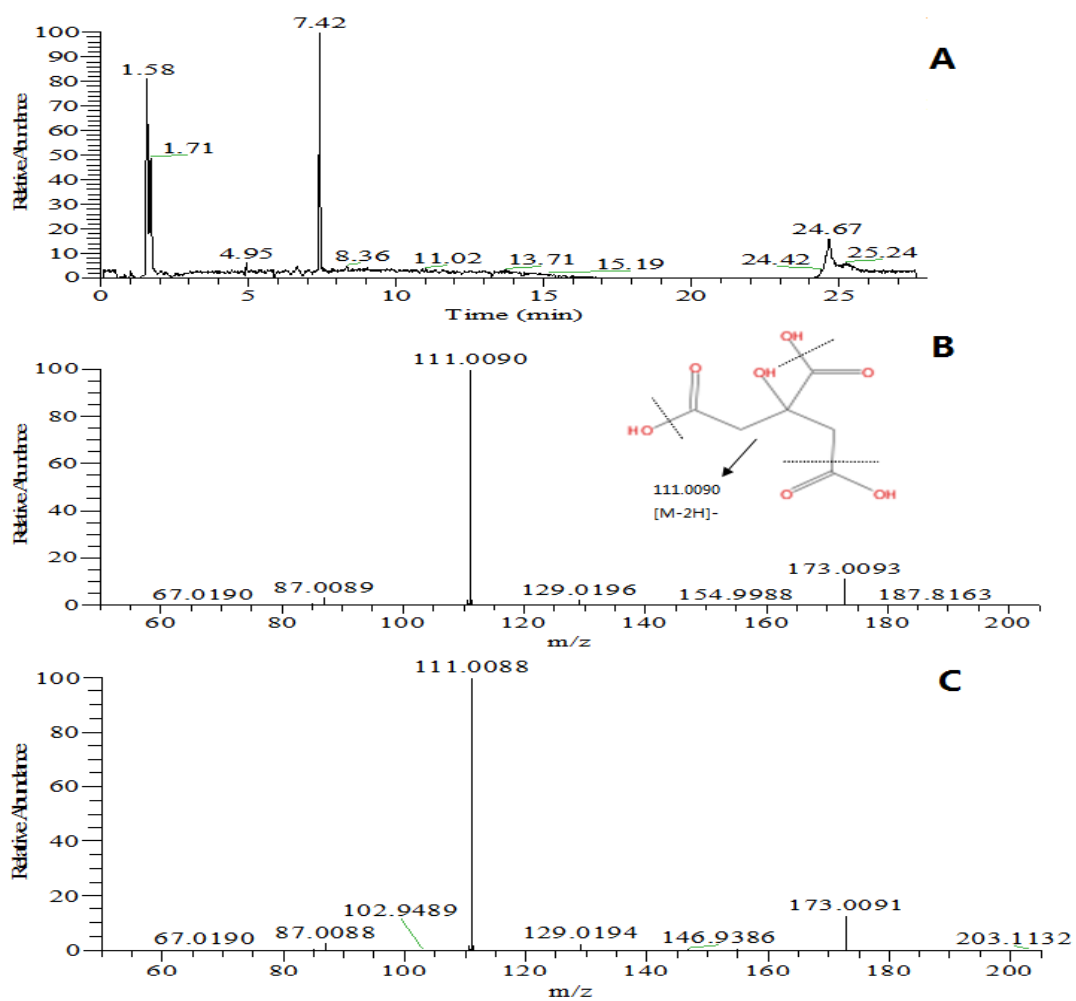

Figure S1. Identification of a selected marker ( $m/z$  191.02). (A) Extracted ion chromatogram (EIC) of  $m/z$  191.02; (B) MS/MS spectrum of the ion; (C) MS/MS spectrum of a commercial standard critic acid
